# Supplementary material for: Comprehensive transcriptome analysis and functional characterization of PR-5 for its involvement in tomato Sw-7 resistance to tomato spotted wilt tospovirus
Source: PubMed Central journal article supplement (PMC6529424; doi:10.1038/s41598-019-44100-x), 2019-05-21
Supplement: 41598_2019_44100_MOESM1_ESM.pdf [file 41598_2019_44100_MOESM1_ESM.pdf]

**Title:** Comprehensive transcriptome analysis and functional characterization of PR-5 for its involvement in tomato *Sw-7* resistance to tomato spotted wilt tospovirus

**Supplementary Information**

**Author list:** Chellappan Padmanabhan<sup>1</sup>, Qiyue Ma<sup>2</sup>, Reza Shekasteband<sup>3</sup>, Kevin. S. Stewart<sup>1</sup>, Samuel F. Hutton<sup>3</sup>, John W. Scott<sup>3</sup>, Zhangjun Fei<sup>2,4\*</sup> and Kai-Shu Ling<sup>1\*</sup>

**SUPPLEMENTARY TABLES:**

**Supplementary Table S1.** Evaluation of virus accumulation on each test plant of S-line and Sw-7 line on days post inoculation using TSWV-specific real-time quantitative RT-PCR

| Treatment                      | Test plants and replicates        | Ct (dRn) <sup>d</sup> | Mean Ct replicate | Mean Ct treatment |
|--------------------------------|-----------------------------------|-----------------------|-------------------|-------------------|
| S-1 control <sup>a</sup>       | before inoculation 1 <sup>a</sup> | No Ct                 | No Ct             | No Ct             |
|                                | before inoculation 1              | No Ct                 |                   |                   |
|                                | before inoculation 2              | No Ct                 | No Ct             |                   |
|                                | before inoculation 2              | No Ct                 |                   |                   |
|                                | before inoculation 3              | No Ct                 | No Ct             |                   |
|                                | before inoculation 3              | No Ct                 |                   |                   |
| Sw-7 <sup>b</sup>              | before inoculation 1 <sup>b</sup> | No Ct                 | No Ct             | No Ct             |
|                                | before inoculation 1              | No Ct                 |                   |                   |
|                                | before inoculation 2              | No Ct                 | No Ct             |                   |
|                                | before inoculation 2              | No Ct                 |                   |                   |
|                                | before inoculation 3              | No Ct                 | No Ct             |                   |
|                                | before inoculation 3              | No Ct                 |                   |                   |
| Non-template                   | Non-template control 1            | No Ct                 | No Ct             | No Ct             |
|                                | Non-template control 2            | No Ct                 |                   |                   |
| S-1 Control_4 dpi <sup>c</sup> | TSWV inoculation 1                | 23.12                 | 23.50             | 27.02             |
|                                | TSWV inoculation 1                | 23.88                 |                   |                   |
|                                | TSWV inoculation 2                | 27.91                 | 28.06             |                   |
|                                | TSWV inoculation 2                | 28.21                 |                   |                   |
|                                | TSWV inoculation 3                | 29.86                 | 29.50             |                   |
|                                | TSWV inoculation 3                | 29.14                 |                   |                   |
| Sw-7_4 dpi                     | TSWV inoculation 1                | 27.33                 | 27.22             | 27.43             |
|                                | TSWV inoculation 1                | 27.10                 |                   |                   |
|                                | TSWV inoculation 2                | 24.81                 | 24.45             |                   |
|                                | TSWV inoculation 2                | 24.45                 |                   |                   |
|                                | TSWV inoculation 3                | 30.26                 | 30.63             |                   |
|                                | TSWV inoculation 3                | 31.00                 |                   |                   |
| S-1 Control_7 dpi              | TSWV inoculation 1                | 23.16                 | 22.88             | 22.46             |
|                                | TSWV inoculation 1                | 22.59                 |                   |                   |
|                                | TSWV inoculation 2                | 18.10                 | 18.10             |                   |
|                                | TSWV inoculation 2                | 28.42                 |                   |                   |
|                                | TSWV inoculation 3                | 25.89                 | 26.40             |                   |
|                                | TSWV inoculation 3                | 26.91                 |                   |                   |
| Sw-7_7 dpi                     | TSWV inoculation 1                | 38.17                 | 35.94             | 35.01             |
|                                | TSWV inoculation 1                | 33.71                 |                   |                   |
|                                | TSWV inoculation 2                | 34.74                 | 34.63             |                   |
|                                | TSWV inoculation 2                | 34.52                 |                   |                   |
|                                | TSWV inoculation 3                | 34.31                 | 34.47             |                   |

|                    |                    |       |       |       |
|--------------------|--------------------|-------|-------|-------|
|                    | TSWV inoculation 3 | 34.63 |       |       |
| S-1 Control_14 dpi | TSWV inoculation 1 | 16.35 | 16.35 | 22.54 |
|                    | TSWV inoculation 1 | 16.36 |       |       |
|                    | TSWV inoculation 2 | 15.60 | 16.03 |       |
|                    | TSWV inoculation 2 | 16.45 |       |       |
|                    | TSWV inoculation 3 | 35.40 | 35.25 |       |
|                    | TSWV inoculation 3 | 35.09 |       |       |
| Sw-7_14 dpi        | TSWV inoculation 1 | 32.61 | 29.41 | 33.04 |
|                    | TSWV inoculation 1 | 26.20 |       |       |
|                    | TSWV inoculation 2 | 32.66 | 30.51 |       |
|                    | TSWV inoculation 2 | 28.35 |       |       |
|                    | TSWV inoculation 3 | 39.28 | 39.22 |       |
|                    | TSWV inoculation 3 | 39.15 |       |       |
| S-1 Control_21 dpi | TSWV inoculation 1 | 15.84 | 15.90 | 16.88 |
|                    | TSWV inoculation 1 | 15.95 |       |       |
|                    | TSWV inoculation 2 | 16.74 | 16.43 |       |
|                    | TSWV inoculation 2 | 16.12 |       |       |
|                    | TSWV inoculation 3 | 15.20 | 18.32 |       |
|                    | TSWV inoculation 3 | 18.32 |       |       |
| Sw-7_21 dpi        | TSWV inoculation 1 | 32.75 | 33.03 | 31.51 |
|                    | TSWV inoculation 1 | 33.30 |       |       |
|                    | TSWV inoculation 2 | 30.76 | 27.49 |       |
|                    | TSWV inoculation 2 | 24.22 |       |       |
|                    | TSWV inoculation 3 | No Ct | 34.02 |       |
|                    | TSWV inoculation 3 | 34.02 |       |       |
| S-1 Control_35 dpi | TSWV inoculation 1 | 21.10 | 19.14 | 20.48 |
|                    | TSWV inoculation 1 | 17.17 |       |       |
|                    | TSWV inoculation 2 | 21.09 | 18.46 |       |
|                    | TSWV inoculation 2 | 15.82 |       |       |
|                    | TSWV inoculation 3 | 24.89 | 23.85 |       |
|                    | TSWV inoculation 3 | 22.80 |       |       |
| Sw-7_35 dpi        | TSWV inoculation 1 | 33.47 | 31.53 | 32.41 |
|                    | TSWV inoculation 1 | 29.58 |       |       |
|                    | TSWV inoculation 2 | 34.03 | 34.01 |       |
|                    | TSWV inoculation 2 | 33.99 |       |       |
|                    | TSWV inoculation 3 | 33.75 | 31.71 |       |
|                    | TSWV inoculation 3 | 29.66 |       |       |

<sup>a</sup>S-1 control is a TSWV susceptible breeding line, Fla. 8059 used as a recurrent parent for backcrossing.

<sup>b</sup>Sw-7 is near-isogenic line containing Sw-7 gene for TSWV resistance through backcrossing to the Fla. 8059 for BC6 generations, theoretically 98.438% identical to the recurrent parent Fla. 8059.

<sup>c</sup>dpi: days post inoculation with TSWV.

<sup>d</sup>Viral titer measurement in TSWV-inoculated S-line and Sw-7 line was conducted using real time RT-PCR on leaf samples collected at 4, 7, 14, 21 and 35 dpi, with the corresponding Ct values presented.

**Supplementary Table S2.** Differentially expressed tomato genes to have intersected at all time points in Venn diagram

| Gene accession | Gene annotation                                                         | 0 dpi <sup>a</sup> | 4 dpi  | 7 dpi  | 14 dpi | 21 dpi | 35 dpi |
|----------------|-------------------------------------------------------------------------|--------------------|--------|--------|--------|--------|--------|
| Solyc04g081610 | Unknown Protein                                                         | 11.665             | 11.000 | 11.354 | 10.792 | 10.309 | 10.907 |
| Solyc04g081710 | Unknown Protein                                                         | 13.774             | 13.162 | 6.740  | 13.508 | 13.350 | 14.255 |
| Solyc12g013530 | Unknown Protein                                                         | -1.889             | -2.837 | -3.059 | -3.837 | -5.644 | -4.644 |
| Solyc12g013750 | Mannan endo-1,4-beta-mannosidase 3                                      | -6.644             | -6.644 | -5.767 | -6.127 | -6.727 | -5.545 |
| Solyc12g013960 | Unknown Protein                                                         | -2.000             | -2.837 | -3.474 | -3.644 | -4.322 | -3.644 |
| Solyc12g014280 | Chloroplastic group IIA intron splicing facilitator CRS1, chloroplastic | -2.059             | -2.737 | -3.059 | -2.644 | -2.943 | -3.644 |
| Solyc12g015630 | Genomic DNA chromosome 5 P1 clone MDF20                                 | -5.059             | -3.837 | -4.644 | -5.059 | -5.059 | -5.059 |

<sup>a</sup>dpi: days post inoculation.

**Supplementary Table S3.** Selected differentially expressed photosynthetic pathway genes in *Sw-7* compared to the S-line after TSWV inoculation.

| <i>S. lycopersicum</i> accession   | Annotation                               | 4 dpi <sup>a</sup> | 7 dpi | 14 dpi | 21 dpi | 35 dpi |
|------------------------------------|------------------------------------------|--------------------|-------|--------|--------|--------|
| <b>Chlorophyll binding protein</b> |                                          |                    |       |        |        |        |
| Solyc02g070950                     | Chlorophyll a/b binding protein          | -                  | -     | -      | 1.664  | -      |
| Solyc02g070970                     | Chlorophyll a/b binding protein          | -                  | -     | -      | 1.646  | -      |
| Solyc12g011450                     | Chlorophyll a-b binding protein 13       | -                  | -     | -      | -      | 1.884  |
| Solyc07g063600                     | Chlorophyll a-b binding protein 13       | -                  | -     | -      | 1.516  | -      |
| Solyc03g005780                     | Chlorophyll a-b binding protein 3C-like  | -                  | -     | -      | 1.669  | -      |
| Solyc10g006230                     | Chlorophyll a-b binding protein 7        | -                  | -     | -      | 1.411  | 1.888  |
| <b>Cytochrome complex</b>          |                                          |                    |       |        |        |        |
| Solyc01g007540                     | Cytochrome b6-f complex subunit 4        | 2.485              | -     | -      | 1.570  | -      |
| <b>Photosystem subunit protein</b> |                                          |                    |       |        |        |        |
| Solyc08g013670                     | Photosystem I reaction center subunit    | -                  | -     | -      | -      | 1.824  |
| Solyc12g044280                     | Photosystem I reaction center subunit    | -                  | -     | -      | 1.628  | -      |
| Solyc06g066640                     | Photosystem I reaction center subunit    | -                  | -     | -      | 1.511  | -      |
| Solyc08g006930                     | Photosystem I reaction center subunit X  | -                  | -     | -      | 1.536  | -      |
| Solyc01g008510                     | Photosystem II 5 kDa protein,            | -                  | -     | -      | -3.474 | -3.059 |
| Solyc01g102770                     | Photosystem II reaction center protein Z | -                  | -     | -      | 1.561  |        |
| Solyc06g084050                     | Photosystem II reaction center W         | -                  | -     | -      | 1.521  |        |

<sup>a</sup>dpi: days post inoculation.

**Supplementary Table S4.** Evaluating transgenic plants expressing OLP-PR5 for their resistance to TSWV in comparison to that of the transgenic GFP and non-transgenic 'Moneymaker' plants

| Treatment                   | Plant No. | 7 dpi <sup>a</sup> | 14 dpi | 21 dpi | 28 dpi | 35 dpi | Infection status <sup>b</sup> |
|-----------------------------|-----------|--------------------|--------|--------|--------|--------|-------------------------------|
| Transgenic GFP              | 1         | 30.66              | 29.25  | 19.10  | 19.33  | 24.38  | (+)                           |
|                             | 2         | 29.43              | 23.61  | 19.77  | 21.51  | 24.42  | (+)                           |
|                             | 3         | No Ct              | 30.43  | 23.24  | 23.42  | 25.63  | (+)                           |
|                             | 4         | 34.45              | No Ct  | 23.61  | 23.28  | 26.54  | (+)                           |
|                             | 5         | 34.00              | 20.16  | 20.41  | 20.27  | 22.97  | (+)                           |
| Transgenic OLP-PR5          | 1         | No Ct              | 34.25  | No Ct  | 36.23  | 37.45  | (-)                           |
|                             | 2         | 36.98              | 36.88  | No Ct  | 35.20  | 32.36  | (-)                           |
|                             | 3         | No Ct              | No Ct  | 36.11  | 21.32  | 23.63  | (+)                           |
|                             | 4         | 38.47              | 38.03  | 37.88  | 27.43  | 33.28  | (-)                           |
|                             | 5         | 37.55              | 22.14  | 20.81  | 22.02  | 24.93  | (+)                           |
| Control tomato 'Moneymaker' | 1         | 29.18              | 17.59  | 20.02  | 22.62  | 20.60  | (+)                           |
|                             | 2         | 19.68              | 18.77  | 20.19  | 20.53  | 20.54  | (+)                           |
|                             | 3         | 22.27              | 18.26  | 21.11  | 22.36  | 21.57  | (+)                           |
|                             | 4         | 24.83              | 23.20  | 19.50  | 20.43  | 22.91  | (+)                           |
|                             | 5         | 25.53              | 25.39  | 24.09  | 24.33  | 22.75  | (+)                           |
| Healthy control             | 1         | No Ct              | 37.08  | No Ct  | 37.22  | 36.69  | (-)                           |
| Positive control            | 1         | 19.10              | 19.81  | 28.81  | 21.92  | 20.90  | (+)                           |
|                             | 2         | 26.49              | 27.09  | 25.65  | 25.64  | 20.90  | (+)                           |
| Non-template control        | NTC       | 35.51              | No Ct  | No Ct  | 37.31  | 35.64  | (-)                           |

<sup>a</sup>dpi: days post inoculation.

<sup>b</sup>Ct values >35.00 to No Ct were considered negative (-); Ct values <30 were considered positive (+); Ct values 30-35 were considered border lines.

## SUPPLEMENTARY FIGURES:

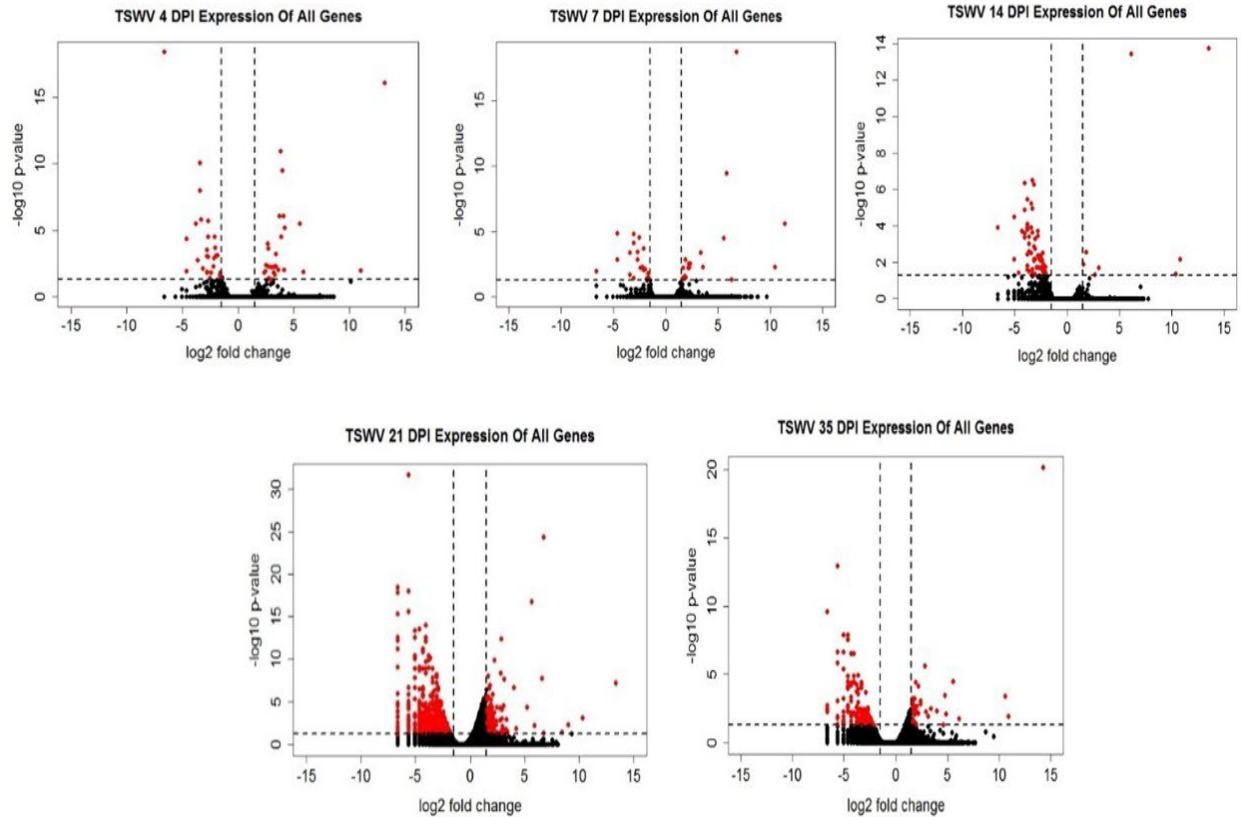

**Supplementary Figure S1.** The Volcano plots illustrate the distribution of all expressed genes and highlighted DEGs with the number of up- and down-regulated genes for each time point on 4, 7, 14, 21 and 35 dpi. Red dots on the right indicate *Sw-7* induced genes and red dots on the left indicate suppressed in *Sw-7*. X-axis represents  $-\log_{10}(\text{p-value})$  and y-axis represents  $\log_2(\text{fold change})$ . Black horizontal dotted lines show the p-value cut off at 0.05. Black vertical dotted lines were drawn using  $\log_2(\text{fold change})$  cut off at -1.5 and 1.5 demonstrating suppressed and induced genes respectively in the *Sw-7* line.

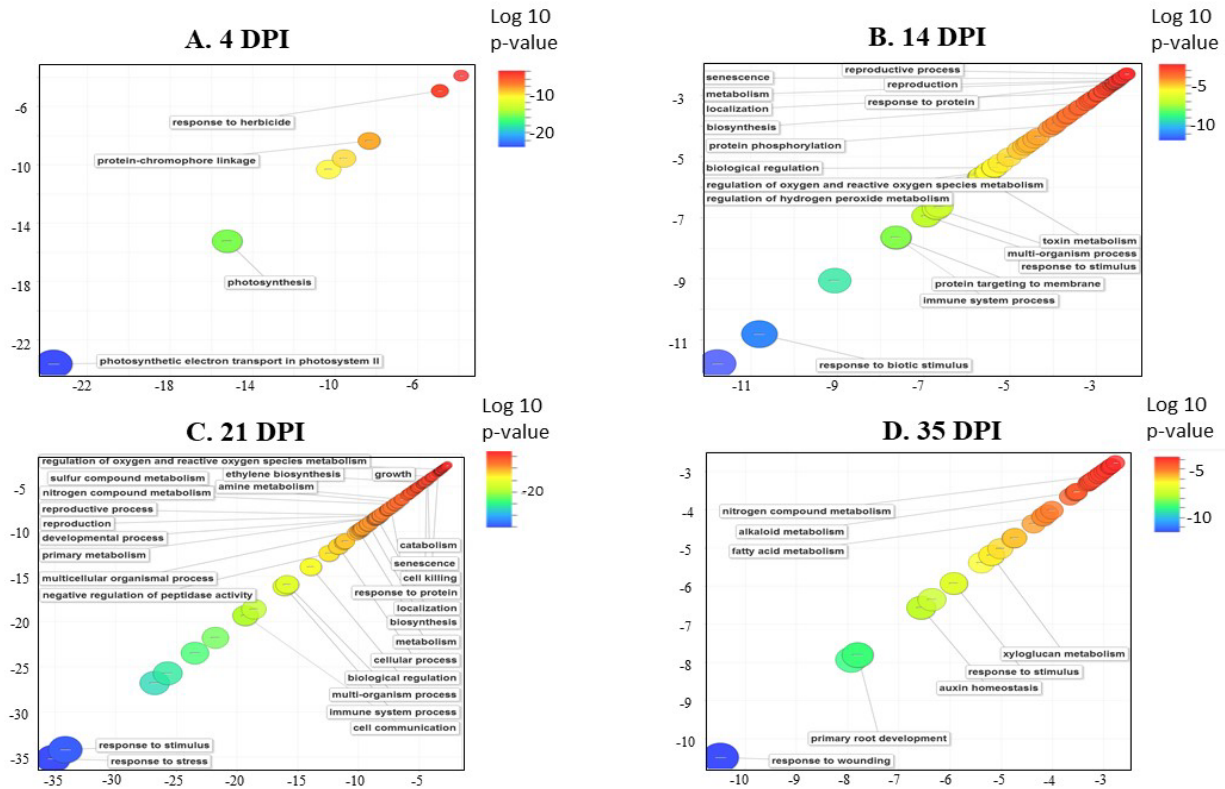

**Supplementary Figure S2.** Scatterplot showing cluster representatives of differentially expressed genes. Figures were generated with the REVIGO program using the list of enriched GO terms at each time point.



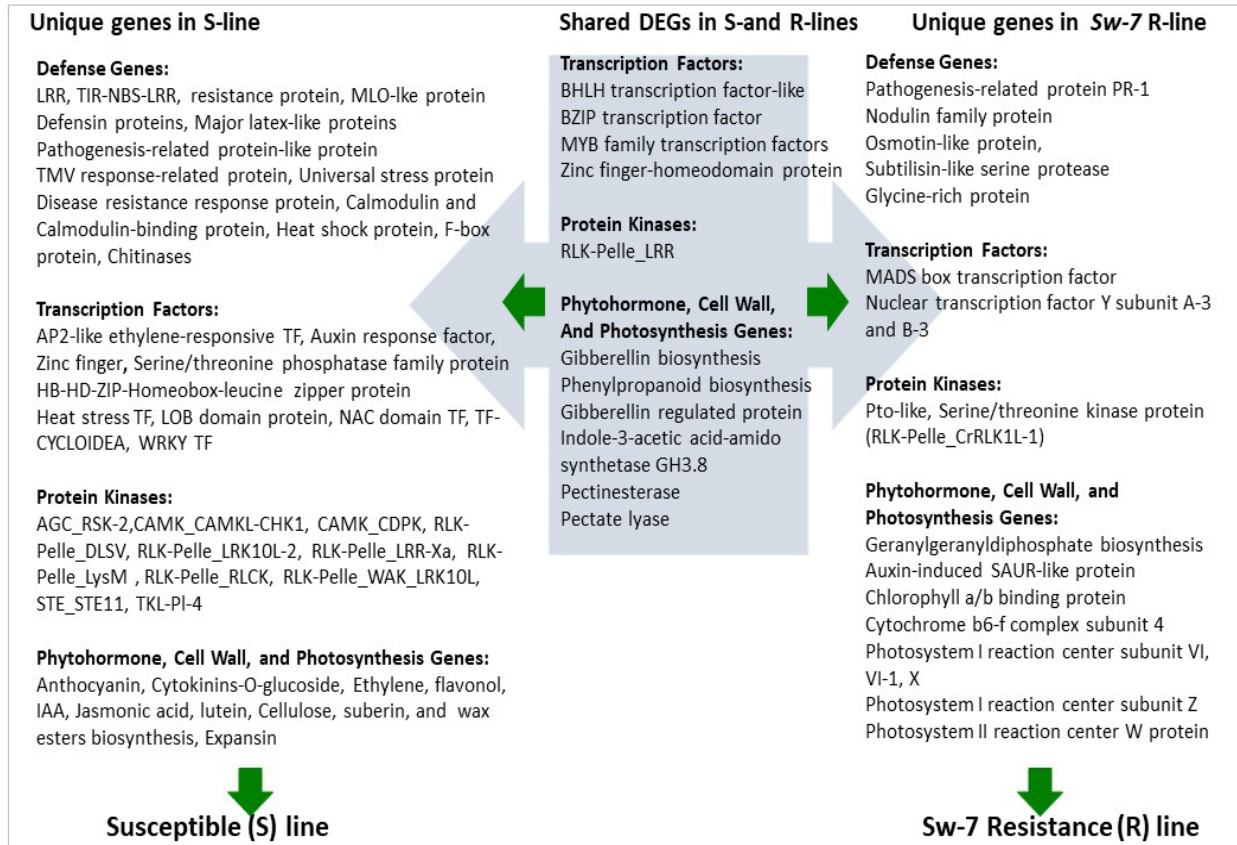

**Supplementary Figure S3.** Summary of the differentially expressed genes (DEGs). We have classified DEGs in four major groups: including a) Defense genes, b) Transcription factors, c) Protein kinases, and d) Phytohormones, cell wall and photosynthesis genes. In each category, certain group of genes are induced in the TSWV-resistant (*Sw-7*) plants (right panel), or in the susceptible (*S*) line (left panel). We have placed a small group of gene members, expressed in both the resistance (*Sw-7*) and the susceptible line in the middle panel.
